# Supplementary material
Source: PubMed Central journal article supplement (PMC7200277)
Supplement: NIHMS1059148-supplement-Supp_Table_1.pdf [file NIHMS1059148-supplement-Supp_Table_1.pdf]

**Supplemental Table 1: Prevalence of Chronic Health Conditions in Older Survivors Across Cancer Sites**

| Chronic Health Conditions        | Overall (n=566) | Breast (n=139) | Colorectal (n=102) | Gynecologic (n=122) | Lung (n= 80) | Prostate (n=123) |
|----------------------------------|-----------------|----------------|--------------------|---------------------|--------------|------------------|
| Heart attack                     | 33              | 5              | 4                  | 3                   | 11           | 10               |
|                                  | 6.50%           | 4.55%          | 4.35%              | 2.80%               | 14.47%       | 8.13%            |
| Angina or coronary heart disease | 64              | 10             | 10                 | 10                  | 16           | 18               |
|                                  | 12.77%          | 9.09%          | 10.87%             | 9.35%               | 21.05%       | 14.63%           |
| Stroke                           | 35              | 8              | 7                  | 6                   | 7            | 7                |
|                                  | 6.89%           | 7.27%          | 7.61%              | 5.61%               | 9.21%        | 5.69%            |
| Asthma                           | 67              | 22             | 10                 | 14                  | 16           | 5                |
|                                  | 13.19%          | 20.00%         | 10.87%             | 13.08%              | 21.05%       | 4.07%            |
| COPD                             | 78              | 9              | 4                  | 12                  | 45           | 8                |
|                                  | 15.35%          | 8.18%          | 4.35%              | 11.21%              | 59.21%       | 6.50%            |
| Some form of arthritis           | 283             | 75             | 44                 | 68                  | 43           | 53               |
|                                  | 55.71%          | 68.18%         | 47.83%             | 63.55%              | 56.58%       | 43.09%           |
| Depressive disorder              | 119             | 39             | 16                 | 29                  | 19           | 16               |
|                                  | 23.43%          | 35.45%         | 17.39%             | 27.10%              | 25.00%       | 13.01%           |
| Kidney disease                   | 44              | 4              | 9                  | 10                  | 11           | 10               |
|                                  | 8.66%           | 3.64%          | 9.78%              | 9.35%               | 14.47%       | 8.13%            |
| Diabetes                         | 92              | 15             | 17                 | 26                  | 15           | 19               |
|                                  | 16.25%          | 10.79%         | 16.67%             | 21.31%              | 18.75%       | 15.45%           |

*COPD = Chronic Obstructive Pulmonary Disorder*
